# Supplementary material
Source: PubMed Central journal article supplement (PMC2657395)
Supplement: 0900874106_0900874106SI.pdf [file 0900874106_0900874106SI.pdf]

# Supporting Information

Sutter et al. 10.1073/pnas.0900874106

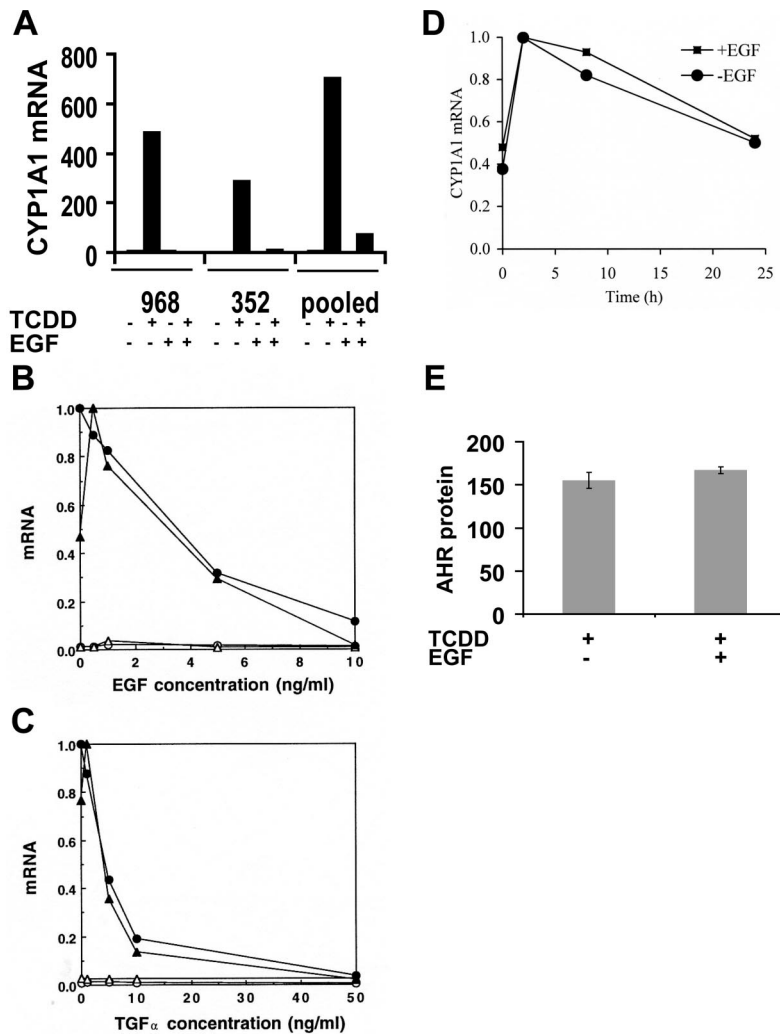

**Fig. S1.** EGF and TGF $\alpha$  dose-dependently repress TCDD-mediated increases in CYP1 mRNA, in multiple individuals, without affecting CYP1A1 messenger RNA half-life or aryl hydrocarbon receptor (AHR) protein. (A) Normal human epidermal keratinocytes (NHEKs) were grown to confluence before basal medium, or medium with EGF (10 ng/mL) was added 24 h before treatment. Messenger RNA was isolated after treatment with either 0.1% DMSO or 2,3,7,8-tetrachlorodibenzo-*p*-dioxin (TCDD) (10 nM) for 24 h. NHEK lines 968 and 352 were isolated from separate individuals, and the pooled sample was from 3 additional individuals. Levels of mRNA ( $n = 1$ ) are expressed in units relative to the minimum, given a value of 1. (B and C) NHEKs were grown to confluence before basal medium, or medium with the indicated amount of EGF, or TGF $\alpha$  was added 24 h before treatment. Cells were treated with either control vehicle or TCDD (10 nM) for 24 h. Levels of mRNA (y axis) are expressed in units relative to the maximum observed density, given a value of 1. (B) Concentration effect of EGF (0, 0.5, 1, 5, and 10 ng/mL). (C) Concentration effect of TGF $\alpha$  (0, 1, 5, 10, and 50 ng/mL). CYP1A1: control (○), TCDD (●); CYP1B1: control (△), TCDD (▲). (D) Medium was replaced with basal medium containing TCDD (10 nM) for 12 h. EGF (10 ng/mL) was added to one set of cells for 4 h, and all of the cells were then treated with actinomycin D (5  $\mu$ g/mL). RNA was isolated 0, 2, 8, and 24 h after the addition of actinomycin D. Levels of RNA (y axis) are expressed in units relative to the maximum observed density for each sample set, given a value of 1. Circles, without EGF; squares, with EGF. (E) NHEKs were grown to confluence before basal medium, or medium with EGF (10 ng/mL) was added 24 h before treatment. Nuclear extracts were isolated after treatment with either TCDD (10 nM) or TCDD plus EGF (10 ng/mL) for 30 min. Densitometric units of AHR protein from immunoblots [mean ( $n = 2$ )  $\pm$  SD] are plotted relative to value obtained from untreated controls.

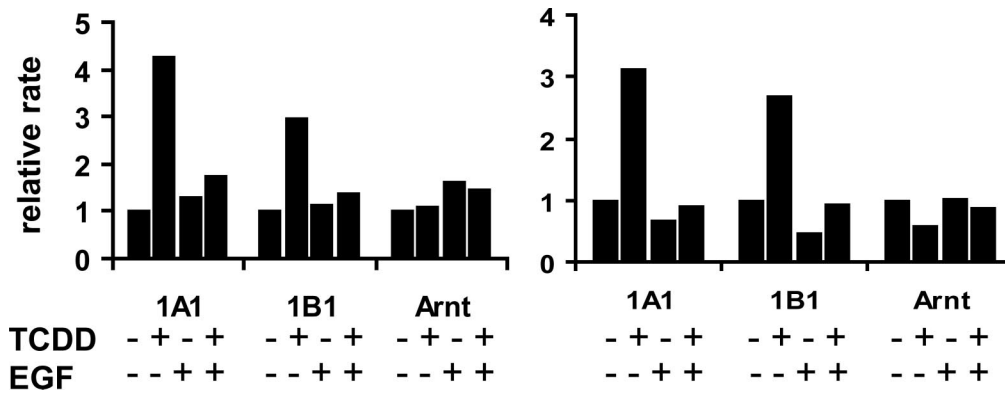

Fig. S2. The rates of transcription of CYP1A1 and CYP1B1 are decreased by EGF. Replicate nuclear run-on experiments are shown. Basal medium, or medium with EGF (10 ng/mL) was added 24 h before treatment. Cells were treated with either 0.1% DMSO or TCDD (10 nM) for 4 h. Hybridization signals were normalized to  $\beta$ -actin and plotted relative to treatment without EGF and TCDD (x axis, -/-), which was given a value of 1 (y axis, relative rate of transcription).

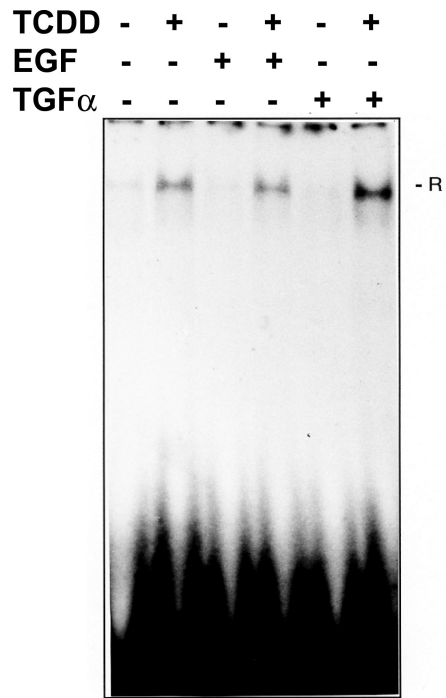

**Fig. S3.** Lack of effect of EGF or TGF $\alpha$  on the DNA binding activity of the AHR or *Ah* receptor nuclear translocator (ARNT). AHR–DNA binding activity (– R) was detected by EMSA under the indicated conditions. Basal medium or medium with EGF (10 ng/mL) or TGF $\alpha$  (50 ng/mL) was added 24 h before treatment. Cells were treated with either 0.1% DMSO or TCDD (10 nM) for 2 h.
